# Supplementary material for: Comparative efficacy and safety of combination therapies for advanced melanoma: a network meta-analysis
Source: PubMed Central journal article supplement (PMC6327485; doi:10.1186/s12885-018-5259-8), 2019-01-09
Supplement: 12885_2018_5259_MOESM3_ESM.pdf [file 12885_2018_5259_MOESM3_ESM.pdf]

|                | Random sequence generation (selection bias) | Allocation concealment (selection bias) | Blinding of participants and personnel (performance bias) | Blinding of outcome assessment (detection bias) | Incomplete outcome data (attrition bias) | Selective reporting (reporting bias) | Other bias |
|----------------|---------------------------------------------|-----------------------------------------|-----------------------------------------------------------|-------------------------------------------------|------------------------------------------|--------------------------------------|------------|
| Carvajal 2014  | +                                           | +                                       | +                                                         | +                                               | ?                                        | ?                                    | ?          |
| Champion 2011  | +                                           | +                                       | +                                                         | ?                                               | ?                                        | ?                                    | ?          |
| Eggermont 2015 | +                                           | +                                       | ?                                                         | +                                               | ?                                        | +                                    | ?          |
| Flaherty 2012  | ?                                           | ?                                       | +                                                         | +                                               | +                                        | +                                    | +          |
| Flaherty 2013  | +                                           | +                                       | +                                                         | +                                               | ?                                        | ?                                    | +          |
| Gupta 2014     | +                                           | +                                       | +                                                         | +                                               | ?                                        | ?                                    | ?          |
| Hauschild 2009 | +                                           | +                                       | ?                                                         | +                                               | ?                                        | ?                                    | ?          |
| Hauschild 2012 | +                                           | +                                       | +                                                         | +                                               | +                                        | +                                    | +          |
| Hodi FS 2010   | +                                           | +                                       | +                                                         | ?                                               | +                                        | +                                    | +          |
| Hodi FS 2014   | ?                                           | +                                       | +                                                         | +                                               | +                                        | ?                                    | +          |
| Kirkwood 2012  | +                                           | +                                       | +                                                         | +                                               | ?                                        | +                                    | +          |
| Larkin 2014    | ?                                           | ?                                       | +                                                         | +                                               | +                                        | +                                    | +          |
| Larkin 2015    | ?                                           | ?                                       | +                                                         | +                                               | +                                        | +                                    | +          |
| Long 2014      | +                                           | +                                       | +                                                         | +                                               | +                                        | +                                    | +          |
| McArthur 2014  | +                                           | +                                       | +                                                         | +                                               | +                                        | +                                    | +          |
| McDermott 2008 | +                                           | ?                                       | ?                                                         | ?                                               | ?                                        | +                                    | +          |
| Postow 2015    | ?                                           | ?                                       | +                                                         | +                                               | +                                        | +                                    | +          |
| Ribas 2013     | ?                                           | ?                                       | +                                                         | +                                               | +                                        | +                                    | +          |
| Ribas 2015     | ?                                           | +                                       | +                                                         | +                                               | ?                                        | ?                                    | ?          |
| Robert 2013    | +                                           | +                                       | +                                                         | ?                                               | ?                                        | ?                                    | ?          |
| Robert 2015    | +                                           | ?                                       | +                                                         | ?                                               | ?                                        | +                                    | +          |
| Robert C 2011  | ?                                           | ?                                       | +                                                         | +                                               | +                                        | +                                    | +          |
| Robert C 2015  | ?                                           | ?                                       | +                                                         | +                                               | +                                        | +                                    | +          |
| RobertL 2015   | ?                                           | +                                       | +                                                         | +                                               | +                                        | +                                    | ?          |
| Weber 2015     | +                                           | +                                       | +                                                         | +                                               | ?                                        | +                                    | ?          |

 low risk of bias; 
  unclear risk of bias
