# Supplementary material for: Comparative efficacy and safety of combination therapies for advanced melanoma: a network meta-analysis
Source: PubMed Central journal article supplement (PMC6327485; doi:10.1186/s12885-018-5259-8), 2019-01-09

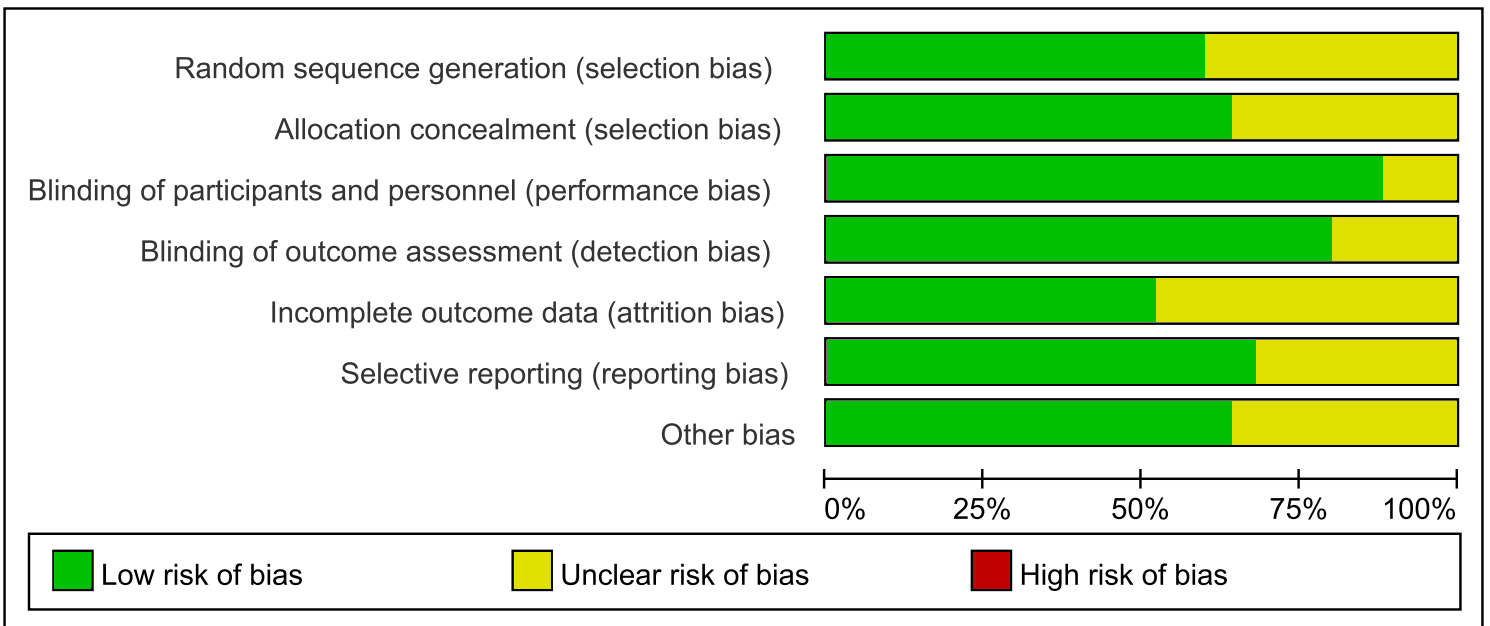

Supplement: 12885_2018_5259_MOESM4_ESM.pdf [file 12885_2018_5259_MOESM4_ESM.pdf]
